# Supplementary material for: A new hybrid nanocatalyst based on Cu-doped Pd–Fe3O4 for tandem synthesis of 2-phenylbenzofurans
Source: Royal Society of Chemistry journal article supplement (doi:10.1039/c5ta05111h), 2015-01-01

## Supporting Information

### **New hybrid nanocatalyst based on Cu-doped Pd -Fe<sub>3</sub>O<sub>4</sub> for tandem synthesis of 2-phenylbenzofurans**

**Hyunje Woo,<sup>a</sup> Daeho Kim,<sup>a</sup> Ji Chan Park,<sup>b</sup> Ji-Woong Kim,<sup>c</sup> Sungkyun Park,<sup>c</sup> Jae Myung Lee<sup>d</sup> and Kang Hyun Park<sup>a\*</sup>**

<sup>a</sup> Department of Chemistry and Chemistry Institute for Functional Materials, Pusan National University, Busan 609-735, Korea.

Phone: (+82)-51-510-2238; Fax: (+82)-51-980-5200; e-mail: chemistry@pusan.ac.kr

<sup>b</sup> Clean Fuel Laboratory, Korea Institute of Energy Research, Daejeon, 305-343, Korea.

<sup>c</sup> Department of physics, Pusan National University, Busan 609-735, Korea.

<sup>d</sup> Department of Naval Architecture & Ocean Engineering, Pusan National University, Busan 609-735, Korea.

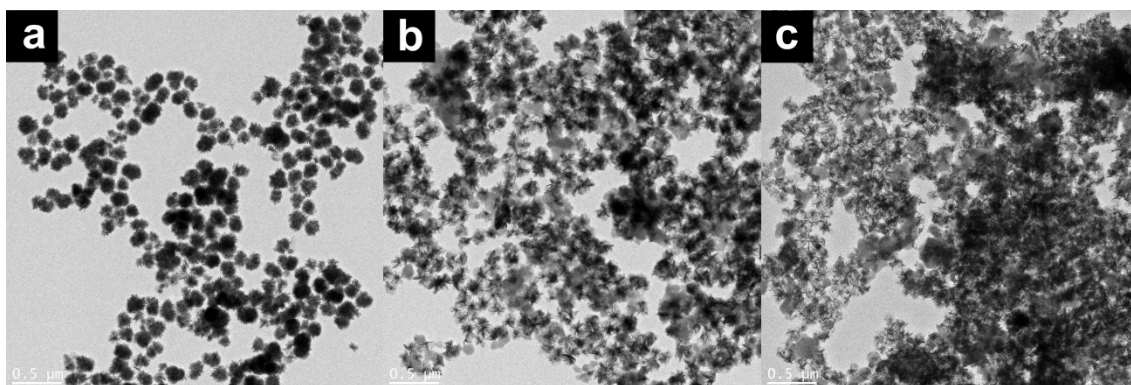

**Fig. S1** Low magnified TEM images of the (a) Cu-doped Pd-Fe<sub>3</sub>O<sub>4</sub>-0, (b) Cu-doped Pd-Fe<sub>3</sub>O<sub>4</sub>-0.3 and (c) Cu-doped Pd-Fe<sub>3</sub>O<sub>4</sub>-0.5 nanocomposites.

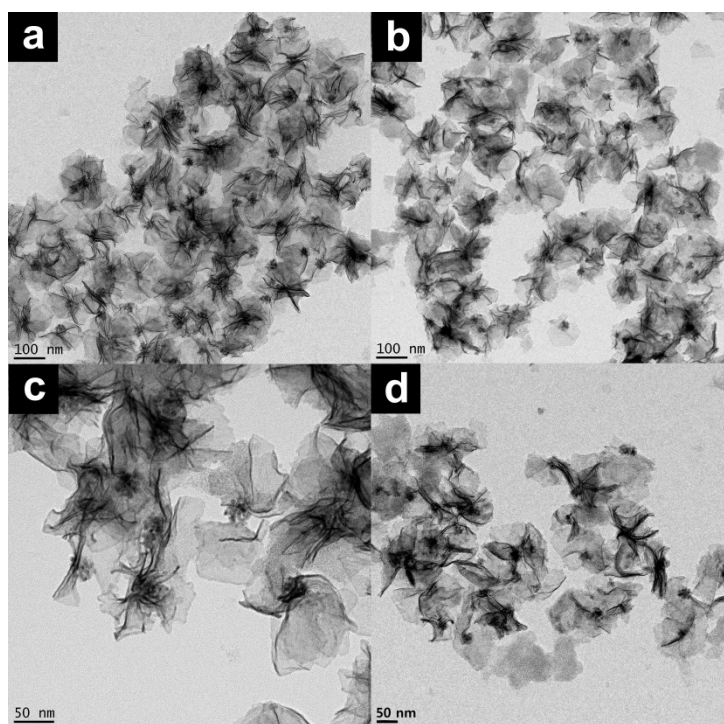

**Fig. S2** TEM images of the Cu-doped Pd-Fe<sub>3</sub>O<sub>4</sub>-0.3 nanocomposites synthesized at different temperature (a,c) 160 °C and (b,d) 200 °C.

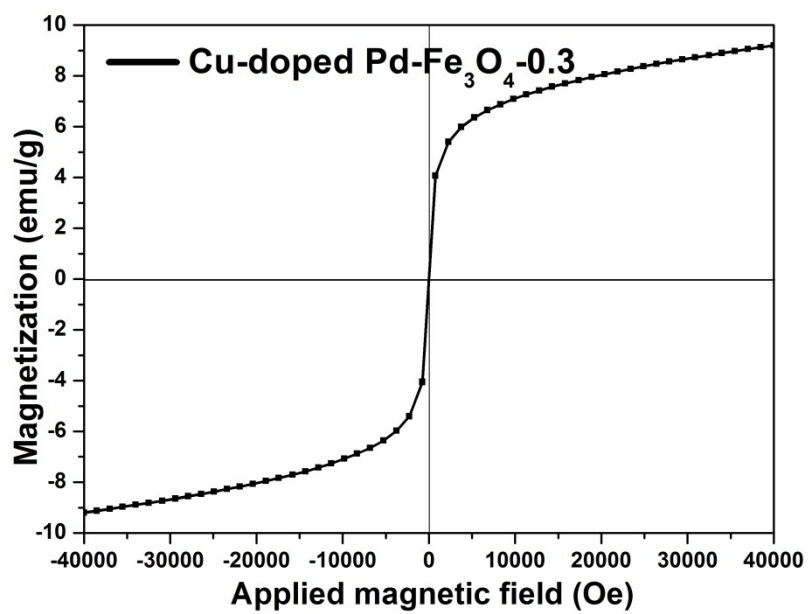

**Fig. S3** SQUID data of Cu-doped Pd-Fe<sub>3</sub>O<sub>4</sub> nanocomposites.

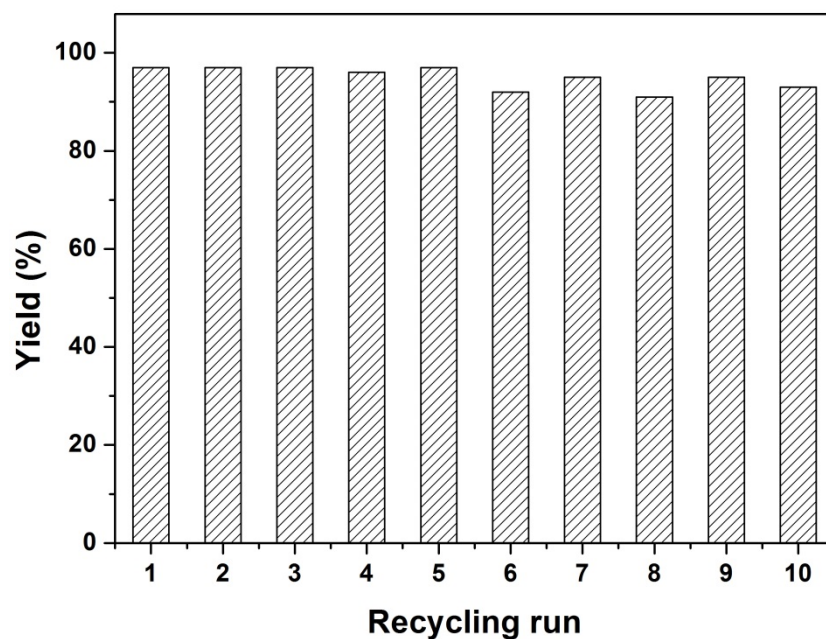

**Fig. S4** GC-MS yields during ten recycling runs. Reaction condition: Cu-doped Pd-Fe<sub>3</sub>O<sub>4</sub>-0.3 catalyst (Cu base: 3.0 mol%), 2-iodophenol (0.5 mmol), phenylpropionic acid (0.6 mmol), NaOAc (1.0 mmol), DMSO (5.0 ml) and 130 °C for 3 h.

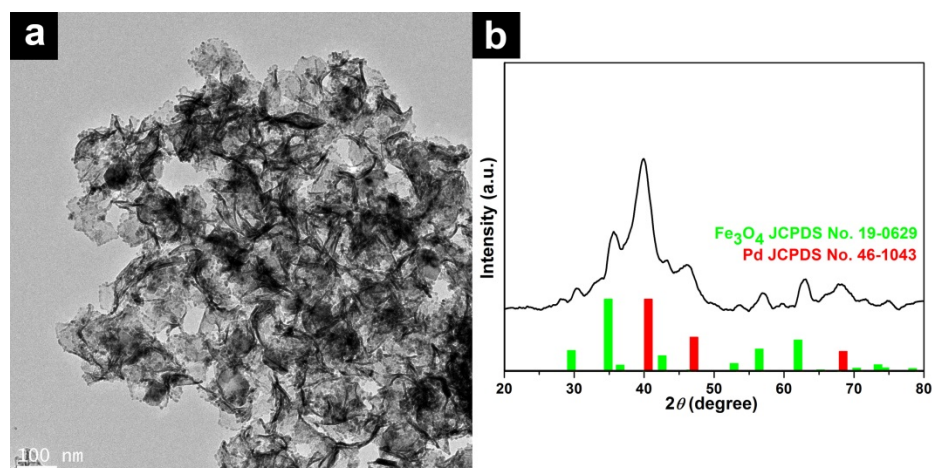

**Fig. S5** (a,b) TEM image and XRD pattern of Cu-doped Pd-Fe<sub>3</sub>O<sub>4</sub>-0.3 catalyst after first reaction.

**Data for  $^1\text{H}$  and GC-MS spectra are reported as follows:**

Chemical shift ( $\delta$  ppm), multiplicity (s = singlet, d = doublet, t = triplet, m = multiplet), coupling constant (Hz), and integration.

**2-phenylbenzofuran<sup>1</sup> (Table 1):**  $^1\text{H}$ -NMR ( $\text{CDCl}_3$ , 300 MHz):  $\delta$  = 7.87 (d,  $J$  = 8.1 Hz, 2H), 7.59 (d,  $J$  = 7.2 Hz, 1H), 7.53 (d,  $J$  = 8.1 Hz, 1H), 7.45 (t,  $J$  = 7.5 Hz, 2H), 7.35 (t,  $J$  = 7.2 Hz, 1H), 7.29 (t,  $J$  = 6.9 Hz, 1H), 7.23 (t,  $J$  = 6.9 Hz, 1H), 7.03 (s, 1H). MS (EI)  $m/z$ : 194(100), 165(60), 139(9), 97(11), 82(13), 28(16).

1. D. Zhao, C. Gao, X. Su, Y. He, J. You and Y. Xue, *Chem. Commun.* **2010**, 46, 9049-9051.

Pulse Sequence: PROTON (s2pul)  
Solvent: cdcl3  
Data collected on: Oct 17 2014

Operator: iomnhb

Relax. delay 1.000 sec  
Pulse 45.0 degrees  
Acq. time 1.704 sec  
Width 4807.7 Hz  
64 repetitions  
OBSERVE H1, 300.1129677 MHz  
DATA PROCESSING  
FT size 16384  
Total time 2 min 53 sec

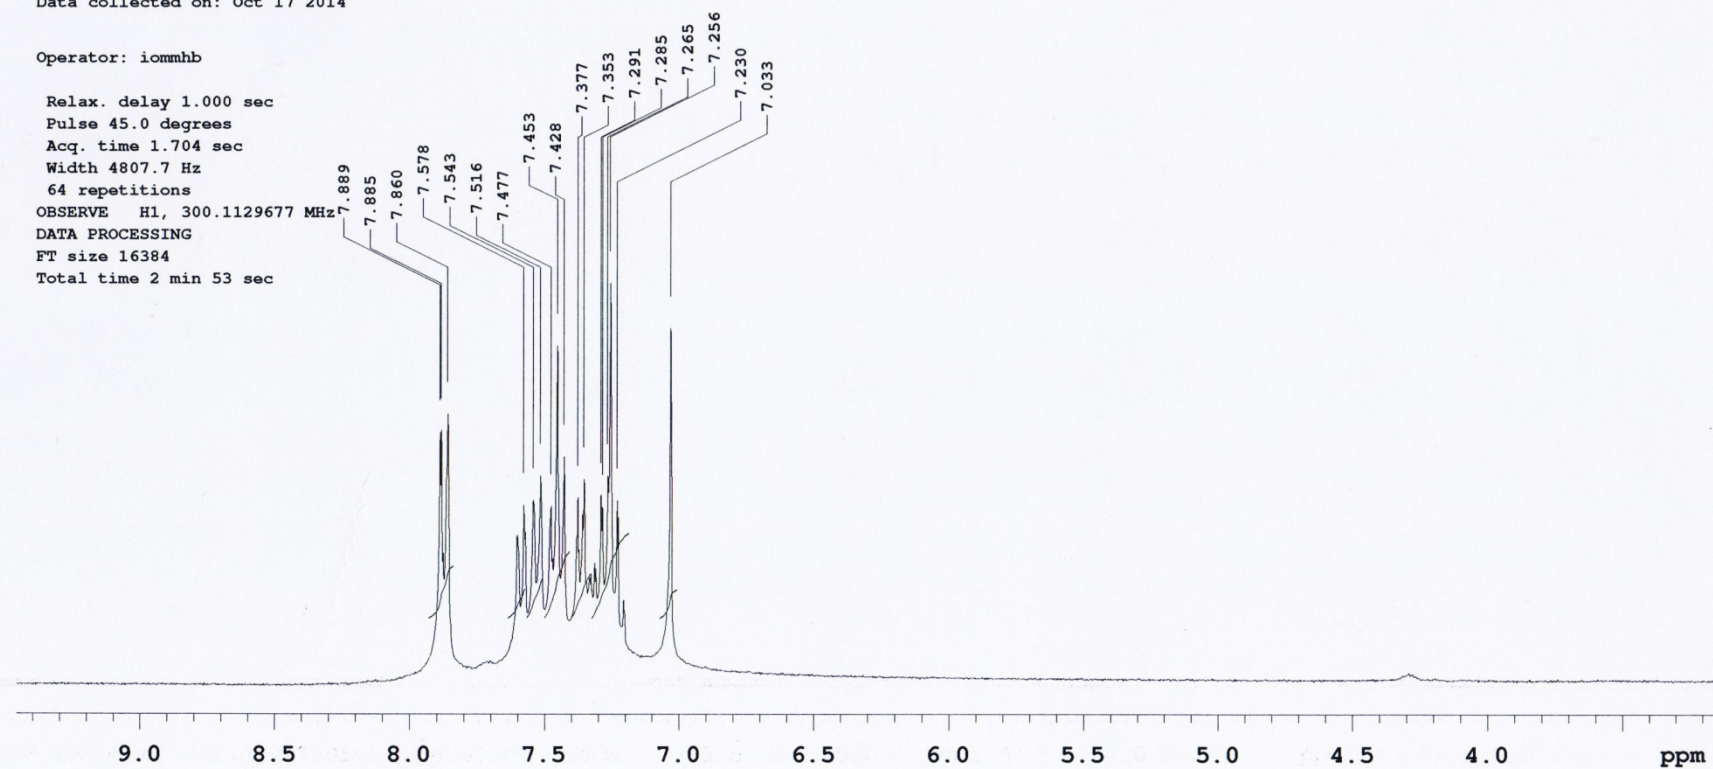



Spectrum

Peak#:1 R.Time:22.844(Scan#:4070)

MassPeaks:245

RawMode:Averaged 22.840-22.850(4069-4071)

BG Mode:Calc. from Peak Group 1 - Event 1

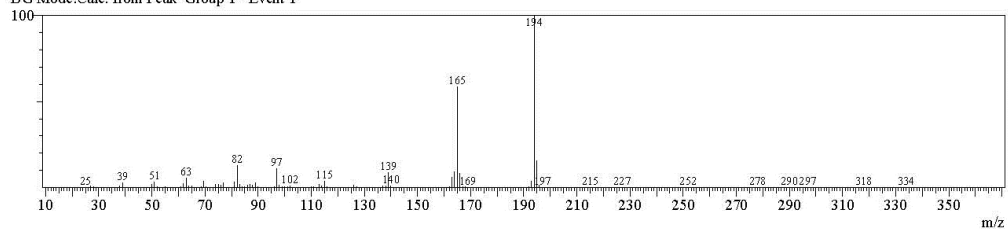

Supplement: c5ta05111h1.pdf [file c5ta05111h1.pdf]
